# Supplementary material
Source: Elsevier journal article supplement (https://www.sciencedirect.com/science/article/pii/S0210569121000747)
Supplement: mmc1 [file S0210569121000747:mmc1.doc]

**Supplementary Material A**

**SCORE: Safety, Communication, Operational Reliability, and Engagement.**

**SCORE: Evaluación de su entorno de trabajo**

**Seguridad, Comunicación, Confianza en el funcionamiento y Compromiso**

Por favor, conteste las siguientes preguntas con respecto a su Unidad o Área clínica. Escoja sus respuestas usando la siguiente escala:

| **A** | **B** | **C** | **D** | **E** | **X** |
| --- | --- | --- | --- | --- | --- |
| Totalmente en desacuerdo | Ligeramente en desacuerdo | Neutral | Ligeramente de acuerdo | Totalmente de acuerdo | No aplicable |

**1)Preparación para la mejora (Ambiente de aprendizaje):**

| En mi entorno laboral se utilizan las sugerencias/aportaciones de las personas que trabajan en él | A | B | C | D | E | X |
| --- | --- | --- | --- | --- | --- | --- |
| En mi entorno laboral se integra lo aprendido de otros entornos de trabajo | A | B | C | D | E | X |
| En mi entorno laboral se resuelven los problemas de forma efectiva para mejorar la calidad de lo que se hace | A | B | C | D | E | X |
| En mi entorno laboral se permite obtener información sobre lo que hacemos bien | A | B | C | D | E | X |
| En mi entorno laboral, la dirección protege el entorno de aprendizaje | A | B | C | D | E | X |

**2)Liderazgo Local:**

| En mi entorno laboral, mi superior está disponible en un horario previamente conocido | A | B | C | D | E | X |
| --- | --- | --- | --- | --- | --- | --- |
| En mi entorno laboral, mi superior dedica periódicamente parte de su tiempo para reforzar positivamente mi trabajo | A | B | C | D | E | X |
| En mi entorno laboral, mi superior frecuentemente me proporciona información sobre mi desempeño | A | B | C | D | E | X |
| En mi entorno laboral, mi superior me proporciona información útil que me permite modificar mi forma de trabajar | A | B | C | D | E | X |
| En mi entorno laboral, mi superior me comunica sus expectativas sobre mis objetivos en el trabajo | A | B | C | D | E | X |

**3)Clima de desgaste**

| En este entorno laboral, los acontecimientos afectan la vida de las personas de manera emocionalmente poco saludable | A | B | C | D | E | X |
| --- | --- | --- | --- | --- | --- | --- |
| Las personas en este entorno laboral sufren desgaste profesional por su trabajo | A | B | C | D | E | X |
| Las personas en este entorno laboral están fatigadas debido a su trabajo | A | B | C | D | E | X |
| Las personas en este entorno laboral se sienten frustradas por su trabajo | A | B | C | D | E | X |
| Las personas en este entorno laboral están trabajando demasiado duro en sus puestos de trabajo | A | B | C | D | E | X |
| Los acontecimientos en este entorno laboral afectan mi vida de una manera emocionalmente no saludable | A | B | C | D | E | X |

4)Burnout

| Estoy “quemado” por mi trabajo | A | B | C | D | E | X |
| --- | --- | --- | --- | --- | --- | --- |
| Me siento fatigado cuando me levanto por las mañanas y tengo que enfrentarme a otra jornada laboral | A | B | C | D | E | X |
| Me siento frustrado por mi trabajo | A | B | C | D | E | X |
| Siento que trabajo demasiado duro en mi puesto de trabajo | A | B | C | D | E | X |
| El mes pasado, he tenido que restringir mis actividades debido a enfermedad | A | B | C | D | E | X |
| En el mes pasado, falté al trabajo (por cualquier motivo) | A | B | C | D | E | X |

**5)Clima respecto al trabajo en equipo**

| Los conflictos en este entorno laboral se resuelven adecuadamente (es decir, no se prioriza por quién tiene la razón, si no que se considera antes qué es lo mejor para el paciente) | A | B | C | D | E | X |
| --- | --- | --- | --- | --- | --- | --- |
| En este entorno laboral, si percibo un problema con el cuidado del paciente, me es difícil decir algo al respecto | A | B | C | D | E | X |
| En este entorno laboral, es fácil hacer preguntas cuando algo relacionado con el cuidado del paciente no se entiende | A | B | C | D | E | X |
| En este entorno laboral, las personas de diferentes categorías profesionales trabajan como un equipo bien coordinado | A | B | C | D | E | X |
| Tratar con compañeros “difíciles” representa un desafío constante en mi trabajo | A | B | C | D | E | X |
| Los errores de comunicación son comunes en mi entorno laboral | A | B | C | D | E | X |
| Los errores de comunicación son comunes entre mi entorno laboral y otros entornos que intervienen en el cuidado del paciente | A | B | C | D | E | X |

**6)Clima de seguridad**

| Si comunicara mis sugerencias sobre calidad, la dirección del centro aplicaría acciones | A | B | C | D | E | X |
| --- | --- | --- | --- | --- | --- | --- |
| En mi entorno laboral los errores se manejan de manera apropiada | A | B | C | D | E | X |
| Recibo información apropiada sobre mi rendimiento | A | B | C | D | E | X |
| La cultura de mi entorno laboral hace que sea fácil aprender de los errores de otras personas | A | B | C | D | E | X |
| Si fuera tratado aquí como paciente, me sentiría seguro | A | B | C | D | E | X |
| En mi entorno laboral es difícil hablar de los errores | A | B | C | D | E | X |
| Los valores de los gestores/directores concuerdan con los valores que las personas que trabajan aquí consideran importantes | A | B | C | D | E | X |

**7)Oportunidades de desarrollo profesional**

| En mi entorno laboral tengo oportunidades para el crecimiento/desarrollo personal. | A | B | C | D | E | X |
| --- | --- | --- | --- | --- | --- | --- |
| En mi entorno laboral tengo la sensación de que puedo alcanzar logros | A | B | C | D | E | X |
| En mi entorno laboral tengo oportunidades para pensar y actuar independientemente | A | B | C | D | E | X |
| En mi entorno laboral tengo libertad para realizar las tareas | A | B | C | D | E | X |
| En mi entorno laboral puedo influir en la planificación de las tareas | A | B | C | D | E | X |
| En mi entorno laboral puedo influir sobre los plazos en los que deben desarrollarse las tareas | A | B | C | D | E | X |

**8)Con respeto a las cargas de trabajo**

| En mi entorno laboral tengo una carga de trabajo excesiva | A | B | C | D | E | X |
| --- | --- | --- | --- | --- | --- | --- |
| En mi entorno laboral trabajo contra reloj | A | B | C | D | E | X |
| En mi entorno laboral se acumulan varias tareas al mismo tiempo | A | B | C | D | E | X |
| En mi entorno laboral es necesario mantener la atención continuamente | A | B | C | D | E | X |
| En mi entorno laboral existe mucha densidad de información y tengo que recordar demasiadas cosas | A | B | C | D | E | X |

**9)Con respecto a mi participación en la toma de decisiones**

| En mi entorno laboral el proceso de la toma decisiones es claro | A | B | C | D | E | X |
| --- | --- | --- | --- | --- | --- | --- |
| En mi entorno laboral está definido a quién dirigirme cuando detecto problemas específicos | A | B | C | D | E | X |
| En mi entorno laboral puedo hablar de los problemas de trabajo con mis superiores | A | B | C | D | E | X |
| En mi entorno laboral puedo participar en las decisiones sobre la naturaleza de mi trabajo | A | B | C | D | E | X |
| Desde mi entorno laboral puedo influir directamente en las decisiones de mi organización | A | B | C | D | E | X |
| Mi organización valora las aportaciones del personal con respeto a las iniciativas tecnológicas | A | B | C | D | E | X |

**10)Con respeto a lo que mi organización me proporciona**

| Puedo vivir cómodamente con mi sueldo | A | B | C | D | E | X |
| --- | --- | --- | --- | --- | --- | --- |
| Con respecto a otras organizaciones, en la mía se pagan buenos salarios | A | B | C | D | E | X |
| Considero que cobro lo suficiente por el trabajo que desempeño | A | B | C | D | E | X |
| En mi entorno laboral tengo oportunidades para progresar económicamente | A | B | C | D | E | X |
| En mi entorno laboral tengo oportunidades de desarrollarme profesionalmente mediante cursos de formación | A | B | C | D | E | X |
| En mi entorno laboral tengo oportunidades de promoción interna | A | B | C | D | E | X |
| En general, estoy satisfecho con lo que me proporciona mi organización | A | B | C | D | E | X |

**11)Durante la última semana, cuantas veces le ha ocurrido esto:**

| **A** | **B** | **C** | **D** | **X** |
| --- | --- | --- | --- | --- |
| Ninguna vez o raramente (menos de un día) | Alguna vez (1-2 días) | Ocasionalmente (3-4 días) | Siempre  (5-7 días) | No aplicable |

| Me he saltado una comida | A | B | C | D | E | X |
| --- | --- | --- | --- | --- | --- | --- |
| Comí una dieta pobremente equilibrada | A | B | C | D | E | X |
| Trabajé todo el día/turno sin descansos | A | B | C | D | E | X |
| Llegué tarde a casa por el trabajo | A | B | C | D | E | X |
| Tuve dificultad para dormir | A | B | C | D | E | X |
| Dormí menos de 5 horas en una noche | A | B | C | D | E | X |
| Cambié planes personales/familiares debido al trabajo | A | B | C | D | E | X |
| Me sentí frustrado por la tecnología | A | B | C | D | E | X |

| **12)Rondas de seguridad:**  ¿En su entorno de trabajo se realizan rondas en las que participan directivos y referentes de su unidad para hablar sobre la seguridad del paciente? | Si | No | No estoy seguro |
| --- | --- | --- | --- |

| ¿Con qué frecuencia participó?  *(señale el número de veces)* | 0 | 1 | 2 | 3 | 4 | 5 | 6 | 7 | >=8 | No estoy seguro |
| --- | --- | --- | --- | --- | --- | --- | --- | --- | --- | --- |

| ¿Recibió información sobre disminución de los riesgos de seguridad del paciente como resultado de las Rondas de Seguridad con Directivos? | Si | No | No estoy seguro |
| --- | --- | --- | --- |

| ¿En su entorno de trabajo se realizan Análisis Aleatorios de Seguridad en Tiempo Real (AASTRE) en las que se aborda aspectos importantes sobre la seguridad del paciente? | Si | No | No estoy seguro |
| --- | --- | --- | --- |

| ¿Con qué frecuencia participa?  *(señale número de veces al mes)* | 0 | 1 | 2 | 3 | 4 | 5 | 6 | 7 | >=8 | No estoy seguro |
| --- | --- | --- | --- | --- | --- | --- | --- | --- | --- | --- |

| Ha participado como profesional que vehiculiza los AASTRE | Si | No | No estoy seguro |
| --- | --- | --- | --- |
| ¿Recibió información sobre aspectos mejorables en la seguridad del paciente como resultado de los AASTRE? | Si | No | No estoy seguro |

**Información general**

| **¿Usted ha respondido este cuestionario anteriormente?** | Si | No | No lo sé |
| --- | --- | --- | --- |

| **Género** |  | Femenino |  | Masculino |
| --- | --- | --- | --- | --- |

| **Trata principalmente a** : |  | Adultos |  | Niños |  | Ambos |
| --- | --- | --- | --- | --- | --- | --- |

| **Duración del turno**: |  | 8 horas |  | 10 horas |  | 12 horas |  | Otros |
| --- | --- | --- | --- | --- | --- | --- | --- | --- |

|  | **Categoría profesional (marque sólo una):** |
| --- | --- |
|  | Médico adjunto |
|  | Médico residente (Médico Especialista en Formación) |
|  | Supervisor-a de enfermería |
|  | Licenciada en enfermería (Diplomada Universitaria de Enfermería –DUE) |
|  | Farmacéutico/a |
|  | Terapeuta (terapeuta respiratorio, fisioterapeuta, terapeuta ocupacional, logopeda) |
|  | Trabajador-a social |
|  | Dietista / Nutricionista |
|  | Soporte clínico (Técnico en emergencias médicas, auxiliar de enfermería, etc.) |
|  | Informático / Biotecnólogo |
|  | Técnico-a (quirófano, laboratorio, radiología) |
|  | Soporte administrativo/a (administrativo-a / Secretario-a / Recepcionista) |
|  | Personal de limpieza |
|  | Otro directivo (por ejemplo, director médico, gerente) |
|  | Otros: |

|  | **Tiempo en la especialidad:** |  |  |
| --- | --- | --- | --- |
|  | Menos de 6 meses |  | De 5 a 10 años |
|  | De 6 a 11 meses |  | De 11 a 20 años |
|  | De 1 a 2 años |  | 21 años o más |
|  | De 3 a 4 años |  |  |

**MUCHAS GRACIAS POR COMPLETAR LA ENCUESTA – AGRADECEMOS SU PARTICIPACIÓN Y SU TIEMPO**
